# Supplementary material
Source: PubMed Central journal article supplement (PMC5985660)

**Supplementary Table S1. Cox regression analysis of BM involvement, IPI score, and COO classification for PFS and OS.**

| Variable              | PFS   |             |         | OS    |             |         |
|-----------------------|-------|-------------|---------|-------|-------------|---------|
|                       | RR    | 95% CI      | P value | RR    | 95% CI      | P value |
| <b>BM involvement</b> |       |             |         |       |             |         |
| Negative              | 1     |             |         | 1     |             |         |
| Concordant            | 1.497 | 1.121-1.998 | 0.006   | 1.396 | 1.030-1.894 | 0.032   |
| Discordant            | 1.236 | 0.843-1.811 | 0.278   | 0.648 | 0.400-1.052 | 0.079   |
| <b>COO</b>            |       |             |         |       |             |         |
| GCB                   | 1     |             |         | 1     |             |         |
| Non-GCB               | 1.383 | 1.084-1.765 | 0.009   | 1.398 | 1.073-1.822 | 0.013   |
| <b>IPI score</b>      |       |             |         |       |             |         |
| Low (0-1)             | 1     |             |         | 1     |             |         |
| Intermediate (2-3)    | 1.974 | 1.420-2.743 | <0.001  | 2.691 | 1.817-3.984 | <0.001  |
| High (4-5)            | 3.114 | 2.122-4.571 | <0.001  | 4.432 | 2.844-6.906 | <0.001  |

RR indicates relative risk.

**Supplementary Table S2. COX regression analysis of treatment, age, and ECOG PS for PFS and OS in patients with concordant BM involvement**

| Variable          | PFS   |             |         | OS    |             |         |
|-------------------|-------|-------------|---------|-------|-------------|---------|
|                   | RR    | 95% CI      | P value | RR    | 95% CI      | P value |
| <b>Treatment</b>  |       |             |         |       |             |         |
| Regular therapy   | 1     |             |         | 1     |             |         |
| Intensive therapy | 0.375 | 0.206-0.684 | 0.001   | 0.364 | 0.186-0.711 | 0.003   |
| <b>Age</b>        |       |             |         |       |             |         |
| ≤60 years         | 1     |             |         | 1     |             |         |
| >60 years         | 1.136 | 0.737-1.752 | 0.564   | 1.368 | 0.850-2.205 | 0.197   |
| <b>ECOG PS</b>    |       |             |         |       |             |         |
| 0,1               | 1     |             |         | 1     |             |         |
| ≥2                | 2.441 | 1.637-3.639 | <0.001  | 2.545 | 1.675-3.865 | <0.001  |

ECOG indicates Eastern Cooperative Oncology Group; PS, performance status; PFS, progression-free survival; OS, overall survival; BM, bone marrow; RR indicates relative risk.

**Supplementary Table S3. Genes differentially expressed between concordant BM involvement patients with high BM-adjusted IPI and low BM-adjusted IPI**

| <b>Genes up-regulated in concordant BM involvement patients with high BM-adjusted IPI</b>   |                                                                                |                |
|---------------------------------------------------------------------------------------------|--------------------------------------------------------------------------------|----------------|
| <b>Gene Symbol</b>                                                                          | <b>Gene Title</b>                                                              | <b>Gene ID</b> |
| MLLT6                                                                                       | PHD Finger Domain Containing                                                   | 4302           |
| ATPIF1                                                                                      | ATPase Inhibitory Factor 1                                                     | 93974          |
| C1QBP                                                                                       | Complement C1q Binding Protein                                                 | 708            |
| COPS9                                                                                       | COP9 Signalosome Subunit 9                                                     | 150678         |
| POLR1D                                                                                      | RNA Polymerase I Subunit D                                                     | 51082          |
| COMMD6                                                                                      | COMM Domain Containing 6                                                       | 170622         |
| SUGT1                                                                                       | MIS12 Kinetochore Complex Assembly Cochaperone                                 | 10910          |
| TMA7                                                                                        | Translation Machinery Associated 7 Homolog                                     | 51372          |
| SNRPD1                                                                                      | Small Nuclear Ribonucleoprotein D1 Polypeptide                                 | 6632           |
| RPS21                                                                                       | Ribosomal Protein S21                                                          | 6227           |
| CCT3                                                                                        | Chaperonin Containing TCP1 Subunit 3                                           | 7203           |
| SERBP1                                                                                      | SERPINE1 mRNA Binding Protein 1                                                | 26135          |
| ATP5J                                                                                       | ATP synthase, H <sup>+</sup> transporting, Mitochondrial Fo Complex Subunit F6 | 522            |
| CACYBP                                                                                      | Calcyclin Binding Protein                                                      | 27101          |
| ATP5I                                                                                       | ATP Synthase, H <sup>+</sup> transporting, Mitochondrial Fo Complex Subunit E  | 521            |
| EXOSC7                                                                                      | Exosome Component 7                                                            | 23016          |
| RPS4X                                                                                       | Ribosomal Protein S4, X-linked                                                 | 6191           |
| POLR3G                                                                                      | RNA Polymerase III Subunit G                                                   | 10622          |
| RPL5                                                                                        | Ribosomal Protein L5                                                           | 6125           |
| RPL23A                                                                                      | Ribosomal Protein L23a                                                         | 6147           |
| RPS20                                                                                       | Ribosomal Protein S20                                                          | 6224           |
| SSBP1                                                                                       | Single Stranded DNA Binding Protein 1                                          | 6742           |
| GSK3B                                                                                       | Glycogen Synthase Kinase 3 beta                                                | 2932           |
| YWHAZ                                                                                       | Tyrosine 3-monooxygenase/tryptophan 5-monooxygenase Activation Protein zeta    | 7534           |
| COTL1                                                                                       | Coactosin Like F-actin Binding Protein 1                                       | 23406          |
| CSPP1                                                                                       | Centrosome and Spindle Pole Associated Protein 1                               | 79848          |
| EHD1                                                                                        | EH Domain Containing 1                                                         | 10938          |
| FCRLA                                                                                       | Fc Receptor Like A                                                             | 84824          |
| GTF2H2                                                                                      | General Transcription Factor IIH Subunit 2                                     | 2966           |
| MCM4                                                                                        | Minichromosome Maintenance Complex Component 4                                 | 4173           |
| MRPL39                                                                                      | Mitochondrial Ribosomal Protein L39                                            | 54148          |
| <b>Genes down-regulated in concordant BM involvement patients with high BM-adjusted IPI</b> |                                                                                |                |
| <b>Gene Symbol</b>                                                                          | <b>Gene Title</b>                                                              | <b>Gene ID</b> |
| CTSB                                                                                        | Cathepsin B                                                                    | 1508           |
| CCPG1                                                                                       | Cell Cycle Progression 1                                                       | 9236           |
| HEATR3                                                                                      | Heat Repeat Containing 3                                                       | 55027          |
| GPHN                                                                                        | Gephyrin                                                                       | 10243          |
| AXL                                                                                         | AXL Receptor Tyrosine Kinase                                                   | 558            |

|           |                                                              |        |
|-----------|--------------------------------------------------------------|--------|
| FBXO32    | F-box Protein 32                                             | 114907 |
| LDLRAD3   | Low Density Lipoprotein Receptor Class A Domain Containing 3 | 143458 |
| SLC11A2   | Solute Carrier Family 11 Member 2                            | 4891   |
| FRMD3     | FERM Domain Containing 3                                     | 257019 |
| TF        | Transferrin                                                  | 7018   |
| WFDC8     | WAP Four-Disulfide Core Domain 8                             | 90199  |
| TLK1      | Tousled Like Kinase 1                                        | 9874   |
| TLR7      | Toll Like Receptor 7                                         | 51284  |
| GOLGA4    | Golgin A4                                                    | 2803   |
| LINC00528 | Long Intergenic non-Protein Coding RNA 528                   | 200298 |
| RBFOX1    | RNA Binding Protein, Fox-1 Homolog 1                         | 54715  |
| GTPBP1    | GTP Binding Protein 1                                        | 9567   |
| ETV7      | ETS Variant 7                                                | 51513  |
| ZNF438    | Zinc Finger Protein 438                                      | 220929 |
| ADAM2     | ADAM Metallopeptidase Domain 2                               | 2515   |
| THAP6     | THAP Domain Containing 6                                     | 152815 |
| LINS1     | Lines Homolog 1                                              | 55180  |
| ZNF599    | Zinc Finger Protein 599                                      | 148103 |
| PNKD      | Paroxysmal non-Kinesigenic Dyskinesia                        | 25953  |
| JAK1      | Janus Kinase 1                                               | 3716   |

**Supplementary Table S4. Genes differentially expressed between concordant BM involvement patients with MYC<sup>+</sup> and MYC<sup>-</sup>**

| <b>Genes up-regulated in concordant BM involvement patients with MYC<sup>+</sup></b>   |                                                                             |                |
|----------------------------------------------------------------------------------------|-----------------------------------------------------------------------------|----------------|
| <b>Gene Symbol</b>                                                                     | <b>Gene Title</b>                                                           | <b>Gene ID</b> |
| METTL15                                                                                | Methyltransferase Like 15                                                   | 196074         |
| NUP35                                                                                  | Nucleoporin 35                                                              | 129401         |
| RITA1                                                                                  | RBPJ Interacting and Tubulin Associated 1                                   | 84934          |
| FAM161A                                                                                | Family with Sequence Similarity 161 Member A                                | 84140          |
| RB1                                                                                    | RB Transcriptional Corepressor 1                                            | 5925           |
| OR7E47P                                                                                | Olfactory Receptor Family 7 Subfamily E Member 47 Pseudogene                | 26628          |
| OR1A2                                                                                  | Olfactory Receptor Family 1 Subfamily A Member 2                            | 26189          |
| TXLNG                                                                                  | Taxilin Gamma                                                               | 55787          |
| SLC15A4                                                                                | Solute Carrier Family 15 Member 4                                           | 121260         |
| PAWR                                                                                   | Pro-apoptotic WT1 Regulator                                                 | 5074           |
| OR7E37P                                                                                | Olfactory Receptor Family 7 Subfamily E Member 37 Pseudogene                | 100506759      |
| PRMT5                                                                                  | Protein Arginine Methyltransferase 5                                        | 10419          |
| ZNF22                                                                                  | Zinc Finger Protein 22                                                      | 7570           |
| DIMT1                                                                                  | DIM1 Dimethyladenosine Transferase 1 Homolog                                | 27292          |
| <b>Genes down-regulated in concordant BM involvement patients with MYC<sup>+</sup></b> |                                                                             |                |
| <b>Gene Symbol</b>                                                                     | <b>Gene Title</b>                                                           | <b>Gene ID</b> |
| N4BP2L1                                                                                | NEDD4 Binding Protein 2 Like 1                                              | 90634          |
| CHD2                                                                                   | Chromodomain Helicase DNA Binding Protein 2                                 | 1106           |
| PBXIP1                                                                                 | PBX Homeobox Interacting Protein 1                                          | 57326          |
| PARD6A                                                                                 | Par-6 Family Cell Polarity Regulator alpha                                  | 50855          |
| NEAT1                                                                                  | Nuclear Paraspeckle Assembly Transcript 1 (non-protein coding)              | 283131         |
| TSR3                                                                                   | TSR3, Acp Transferase Ribosome Maturation Factor                            | 115939         |
| ENGASE                                                                                 | Endo-beta-N-Acetylglucosaminidase                                           | 64772          |
| MALAT1                                                                                 | Metastasis Associated Lung Adenocarcinoma Transcript 1 (non-protein coding) | 378938         |
| ARF1                                                                                   | ADP Ribosylation Factor 1                                                   | 375            |
| APOL2                                                                                  | Apolipoprotein L2                                                           | 23780          |
| ANGEL1                                                                                 | Angel Homolog 1                                                             | 23357          |
| LOC283859                                                                              | Unknown                                                                     | Unknown        |

## Supplementary Figure legends

**Supplementary Figure S1. Survival curves for OS and PFS according to type of BM involvement in DLBCL risk-stratified patients.** (a) Comparisons of OS and PFS according to type of BM involvement in high-risk IPI cohort. (b) Comparisons of OS and PFS according to type of BM involvement in non-GCB cohort.

**Supplementary Figure S2. Survival curves for OS according to clinical and pathologic features in DLBCL patients with positive BM involvement.**

**Supplementary Figure S3. The BM-adjusted IPI for risk stratification in DLBCL patients with positive BM involvement.** (a) The training set. (b) The validation set.

**Supplementary Figure S4. Impact on OS of molecular pathologic parameters in concordant vs negative BM groups.** Con indicates concordant BM involvement; Neg, negative BM involvement; *BCL2-R*, *BCL2* rearrangement; *WT-TP53*, wide-type *TP53*; *MUT-TP53*, mutant-type *TP53*; *MYC-R*, *MYC* rearrangement; DPL, *BCL2/MYC* double-positive lymphoma; DHL, *BCL2/MYC* double-hit lymphoma.

# Figure S1

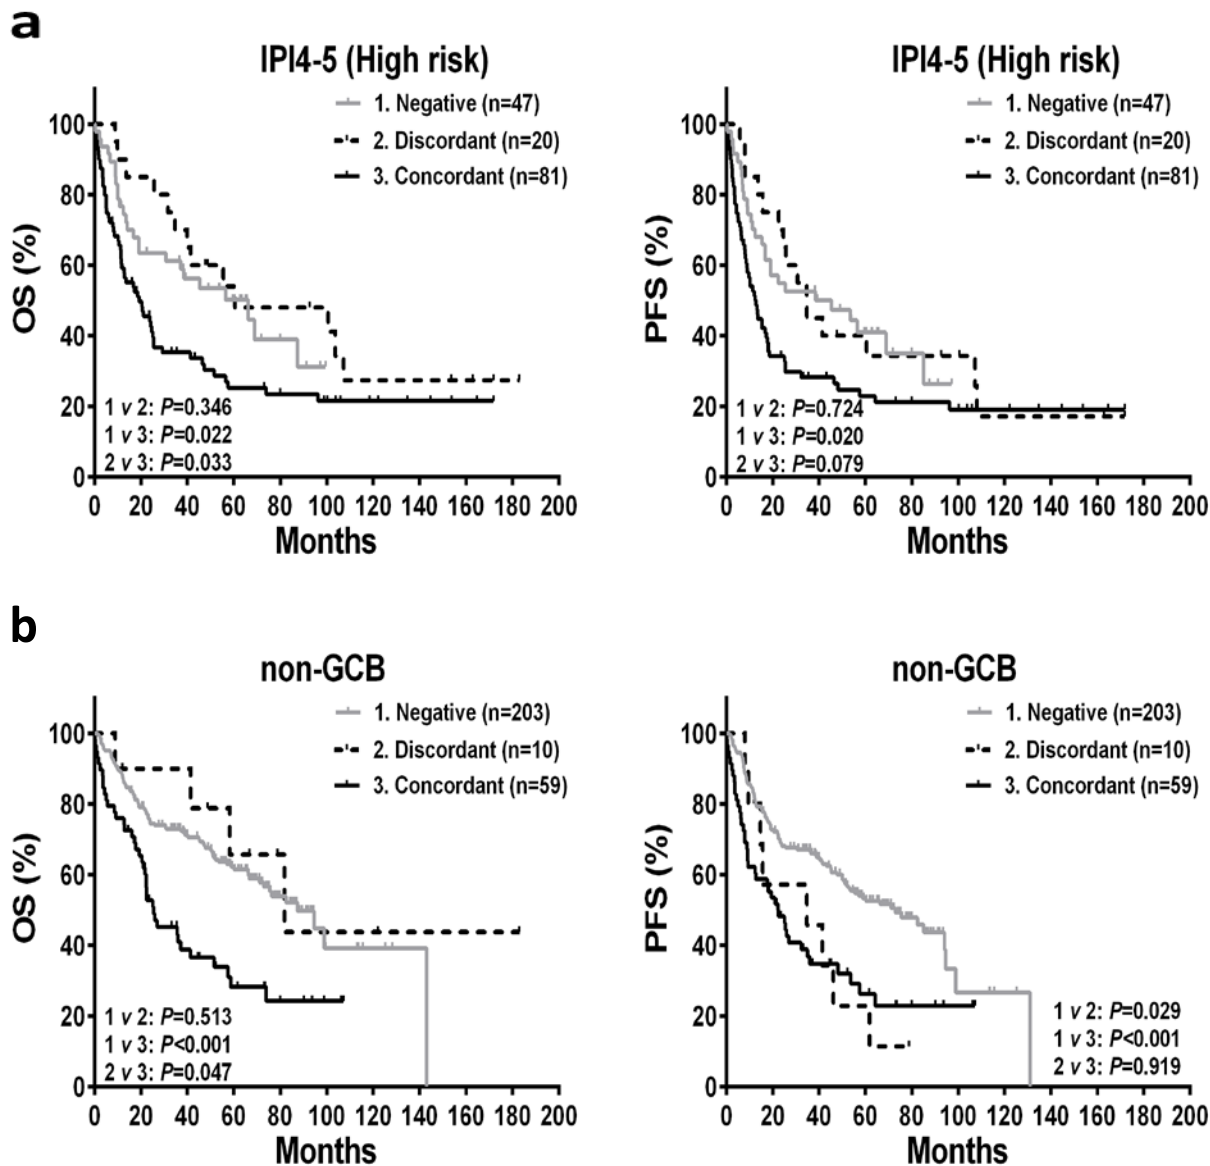

# Figure S2

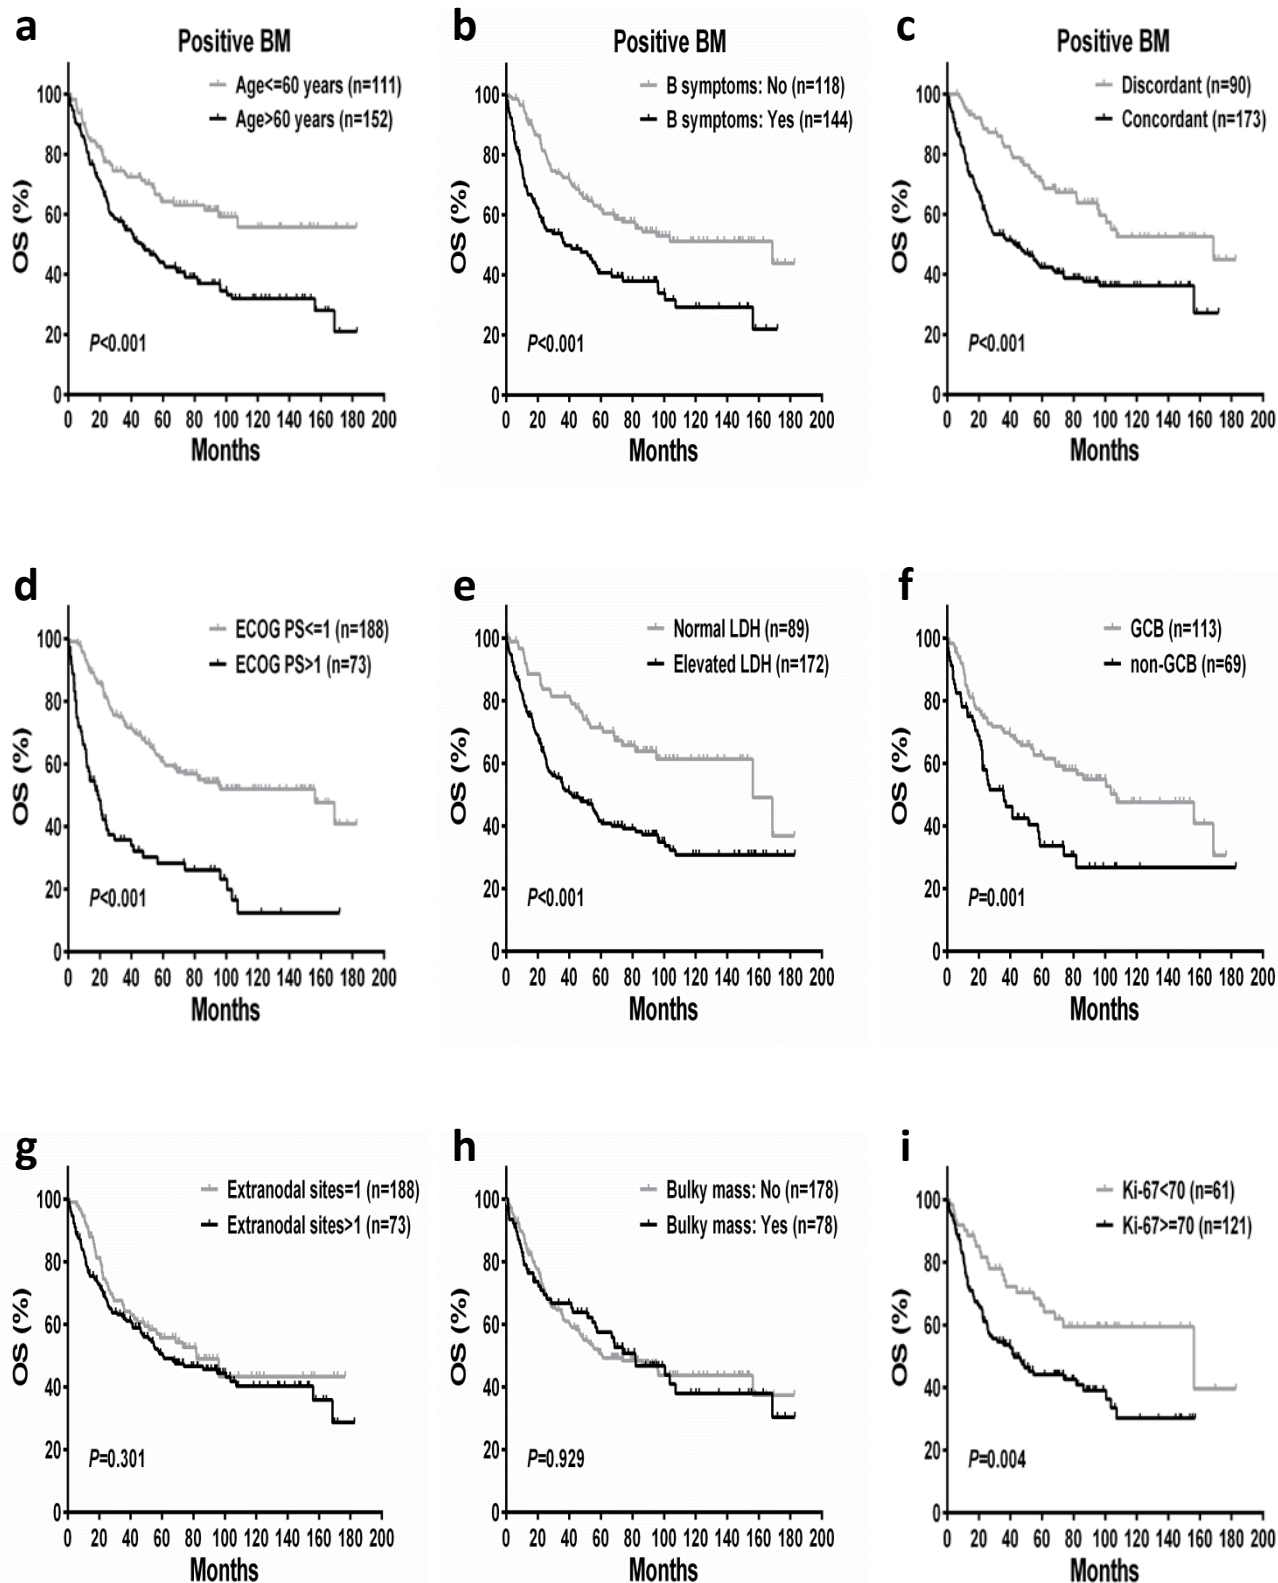

# Figure S3

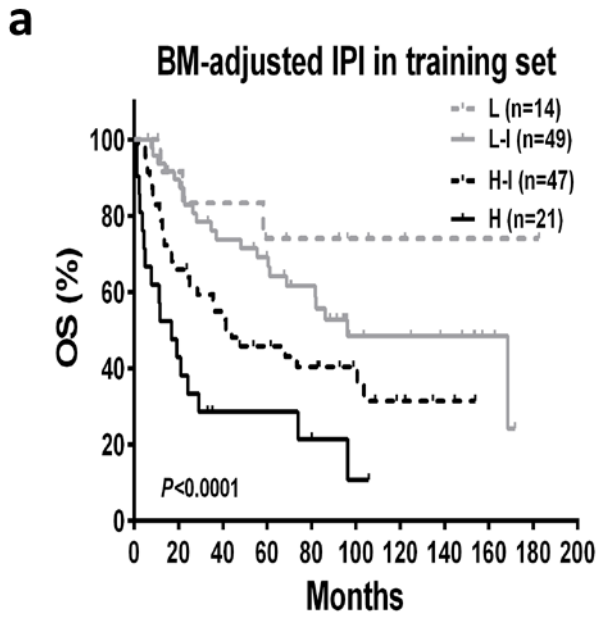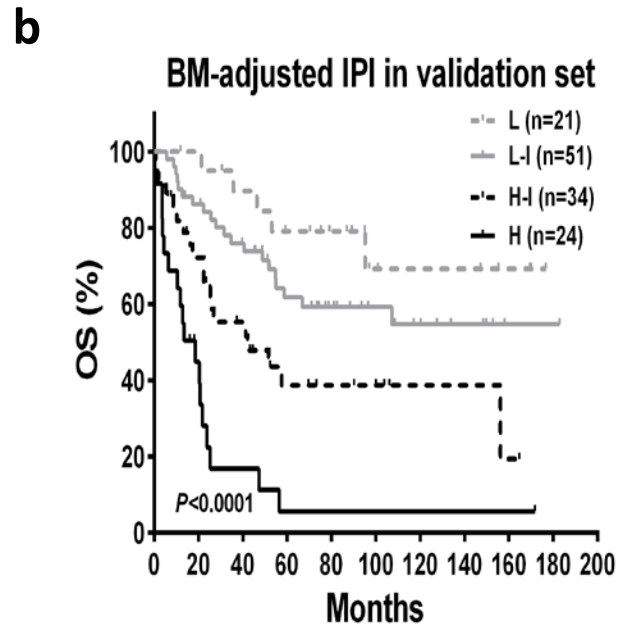



# Figure S4

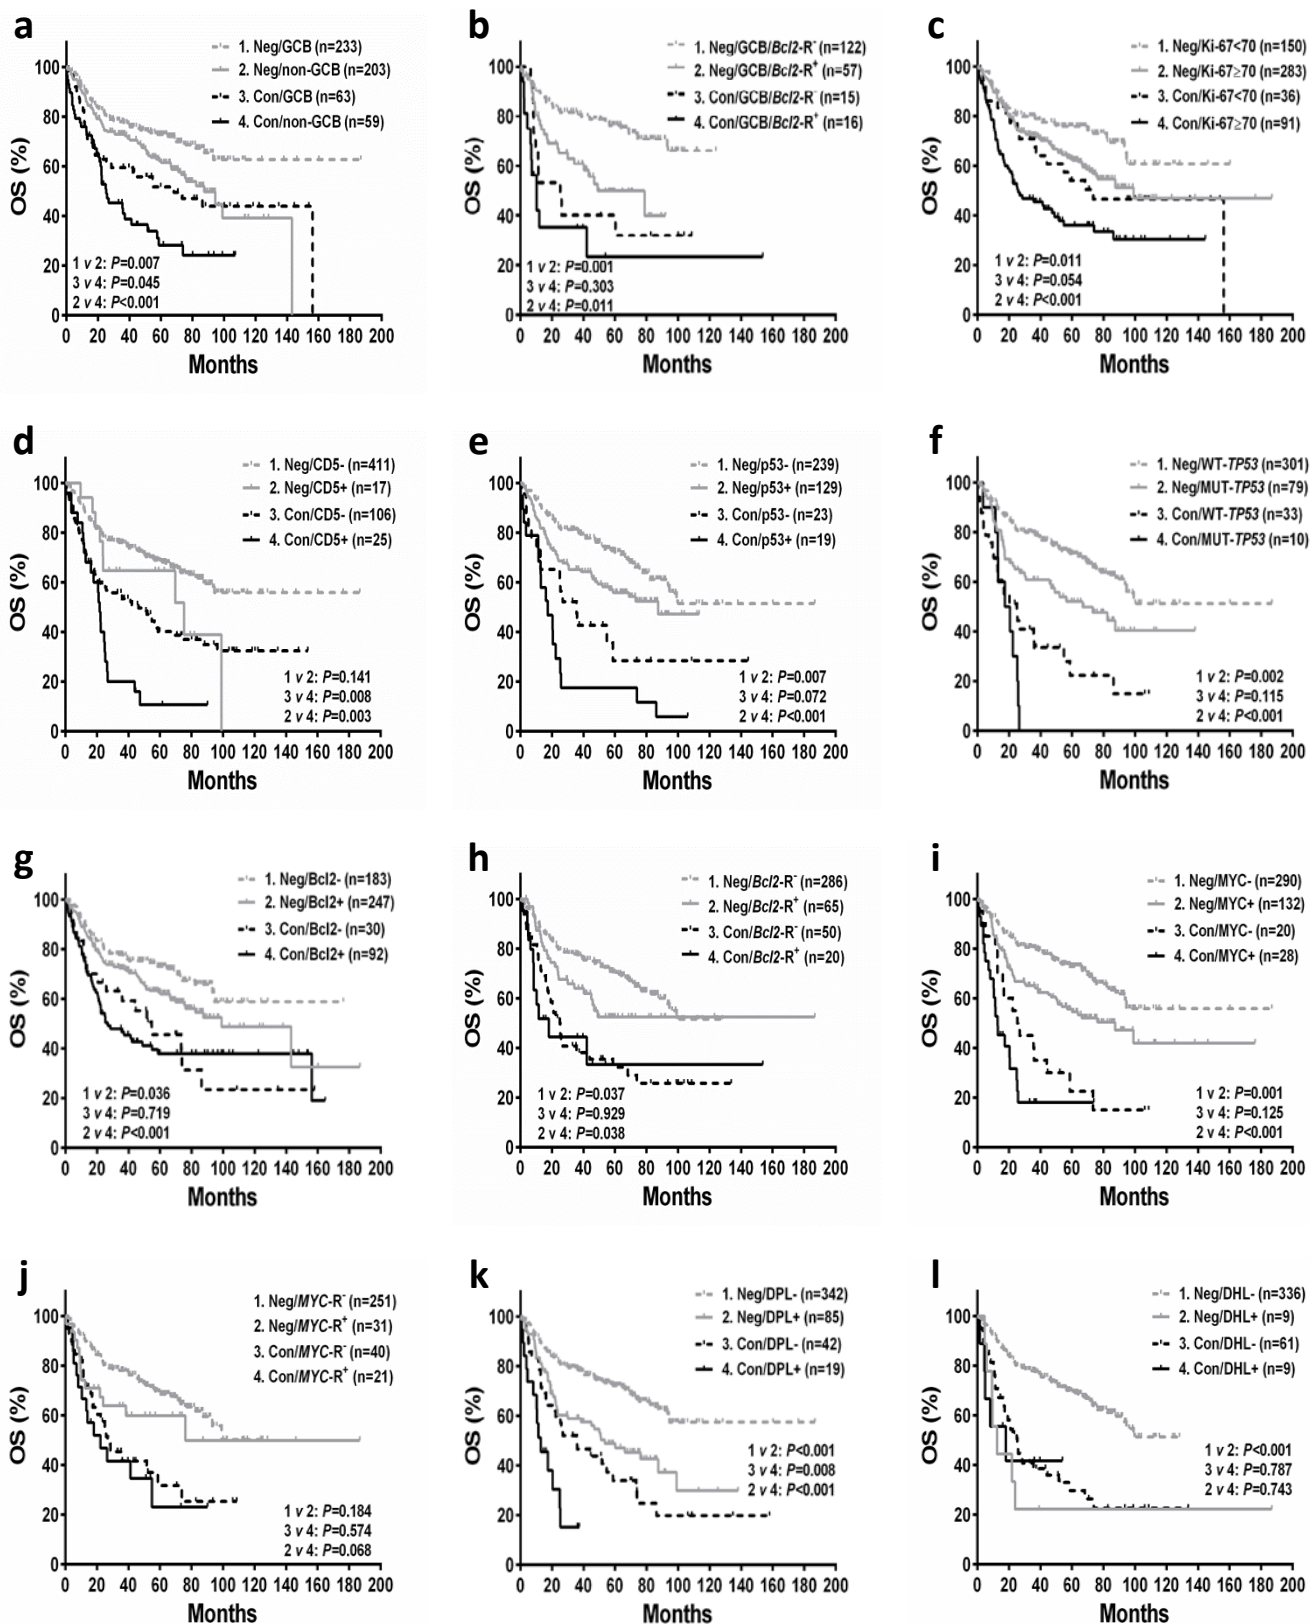

Supplement: NIHMS969547-supplement-Supplement.pdf [file NIHMS969547-supplement-Supplement.pdf]
